# Supplementary material
Source: Springer Nature journal article supplement (https://www.springermedizin.de/resource/supplementary/12913_2007_622_MOESM2_ESM.pdf/9535816)

### General Practitioners

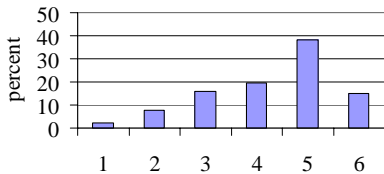

### General Practitioners

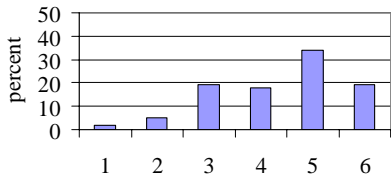

### Specialists

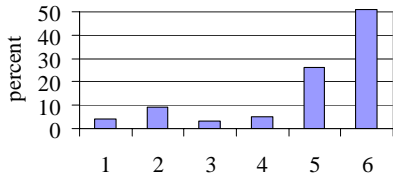

### Specialists

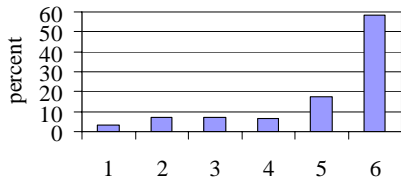

Supplement: MOESM2 [file 9535816]
